# Supplementary material for: Patterns of Positive Selection of the Myogenic Regulatory Factor Gene Family in Vertebrates
Source: PLoS One. 2014 Mar 20;9(3):e92873. doi: 10.1371/journal.pone.0092873 (PMC3961423; doi:10.1371/journal.pone.0092873)
Supplement: Table S1 — Likelihood Ratio Tests for the positive selection on all MRF genes. (XLS) [file pone.0092873.s001.xls]

## Sheet: 模型统计
Table S1. Likelihood Ratio Tests for Positive Selection on the MRFs genes
Lineages		df	Parameters	Positively Selected Sites	Null	Positive	2△
Vertebrates	Site model
	M3 vs M0	4	p=0.10298 w=0.27524	none	-21408.7	-20639.6	1538.21**
	M2a vs M1a	2	p=0.00000 w=5.04392	none	-21240.1	-21240.1	0
	M8 vs M7	2	w=2.4396, p1=0.00001	18S*,20F*,21P*,125G**,127S**,143Q**,144E**,145A*,146A**, 147A**,148P**	-20606.9	-25259.2	8695.37**
	Branch model
	M0 vs Free ratio model	303	ωb=568.98, ωc=494.43, ωe=541.95,ωh=1.027, ωi=223.93, ωk=468.83, ωl=362.39, ωo=507.55	none	-21408.7	-21096.3	624.87**
	M0 vs Two ratio model	1	ω0=0.055, ωc=999.00	none	-21408.7	-21406.5	4.6*
		1	ω0=0.055, ωd=999.00	none	-21408.7	-21404.8	8**
	Branch-site model
	Ha vs Ha0	1	ω=13.099, p=0.236	4A**,6T*,7D**,13S**,14P**, 16L*,30Q**,105D*,114S*, 115N*,117S*,122D*,128S*, 135S**	-21226.8	-21222.8	7.89**
	Hb vs Hb0	1	ω=13.101, p=0.236	4A**,6T*,7D**,13S**,14P**, 16L*,30Q**,105D*,114S*, 115N*,117S*,122D*,128S*, 135S**	-21226.8	-21222.8	7.89**
	Hf vs Hf0	1	ω=109.432, p=0.162	25V*,79S*,118D**,120M*, 124A*	-21233.6	-21231.7	4*
	Hg vs Hg0	1	ω=13.389, p=0.0486	20F**, 22A**, 126K*	-21235.8	-21232.4	7**
	Hj vs Hj0	1	ω=13.146, p=0.0383	109Y*, 113R*	-21237	-21234.5	5*
	Hl vs Hl0	1	ω=27.007, p=0.067	31A*, 111A**	-21235.2	-21232.8	4.87*
	Hm vs Hm0	1	ω=7.7495, p=0.0952	112P**, 116C**, 128S**	-21233.4	-21230.9	5.01**
	Hn vs Hn0	1	ω=17.985, p=0.063	27A*, 101A**	-21236.4	-21234.4	4*
